# Supplementary material for: Investigating the microstructural and electrochemical performance of novel La0.3Ba0.7Zr0.5X0.3Y0.2 (X = Gd, Mn, Ce) electrolytes at intermediate temperature SOFCs
Source: Royal Society of Chemistry journal article supplement (doi:10.1039/d2se01147f), 2022-01-01
Supplement: d2se01147f1.pdf [file d2se01147f1.pdf]

## Investigating the microstructural and electrochemical performance of novel $\text{La}_{0.3}\text{Ba}_{0.7}\text{Zr}_{0.5}\text{X}_{0.3}\text{Y}_{0.2}$ (X = Gd, Mn, Ce) electrolytes at intermediate temperature SOFCs

Muneeb Irshad,<sup>\*+a</sup> Naila Kousar,<sup>+a</sup> Muhammad Bilal Hanif,<sup>+b</sup> Asif Nadeem Tabish,<sup>c</sup> Abdul Ghaffar,<sup>d</sup> Muhammad Rafique,<sup>e</sup> Khurram Siraj,<sup>a</sup> Zeeshan Aslam,<sup>a</sup> Mohammed A. Assiri,<sup>f</sup> Muhammad Imran,<sup>f</sup> Michał Mosiałek,<sup>g</sup> Zuzana Zmrhalova,<sup>h,i</sup> Martin Motola,<sup>\*b</sup>

---

<sup>a.</sup> Department of Physics, University of Engineering and Technology, Lahore 54890, Pakistan

<sup>b.</sup> Department of Inorganic Chemistry, Faculty of Natural Sciences, Comenius University in Bratislava, Ilkovicova 6, Mlynska Dolina, 842 15 Bratislava, Slovakia.

<sup>c.</sup> Department of Chemical Engineering, University of Engineering and Technology, New Campus, Lahore 39021, Pakistan

<sup>d.</sup> Department of Physics, Government College University (GCU), 54000, Lahore, Pakistan

<sup>e.</sup> Department of Physics, University of Sahiwal, 57000 Sahiwal, Pakistan

<sup>f.</sup> Department of Chemistry, Faculty of Science, King Khalid University, Abha 61413, Saudi Arabia

<sup>g.</sup> Jerzy Haber Institute of Catalysis and Surface Chemistry, Polish Academy of Sciences, Niezapominajek 8 PL-30239 Krakow Poland

<sup>h.</sup> Joint Laboratory of Solid State Chemistry, Faculty of Chemical Technology, University of Pardubice, Studentská 84, 532 10 Pardubice, Czech Republic

<sup>i.</sup> Center of Materials and Nanotechnologies, Faculty of Chemical Technology, University of Pardubice, 532 10 Pardubice, Czech Republic

---

\* Corresponding Author: Muneeb Irshad ([muneebirshad@gmail.com](mailto:muneebirshad@gmail.com))

\* Corresponding Author: Martin Motola ([martin.motola@uniba.sk](mailto:martin.motola@uniba.sk); + 421 2 9014 9374)

† Equal contribution

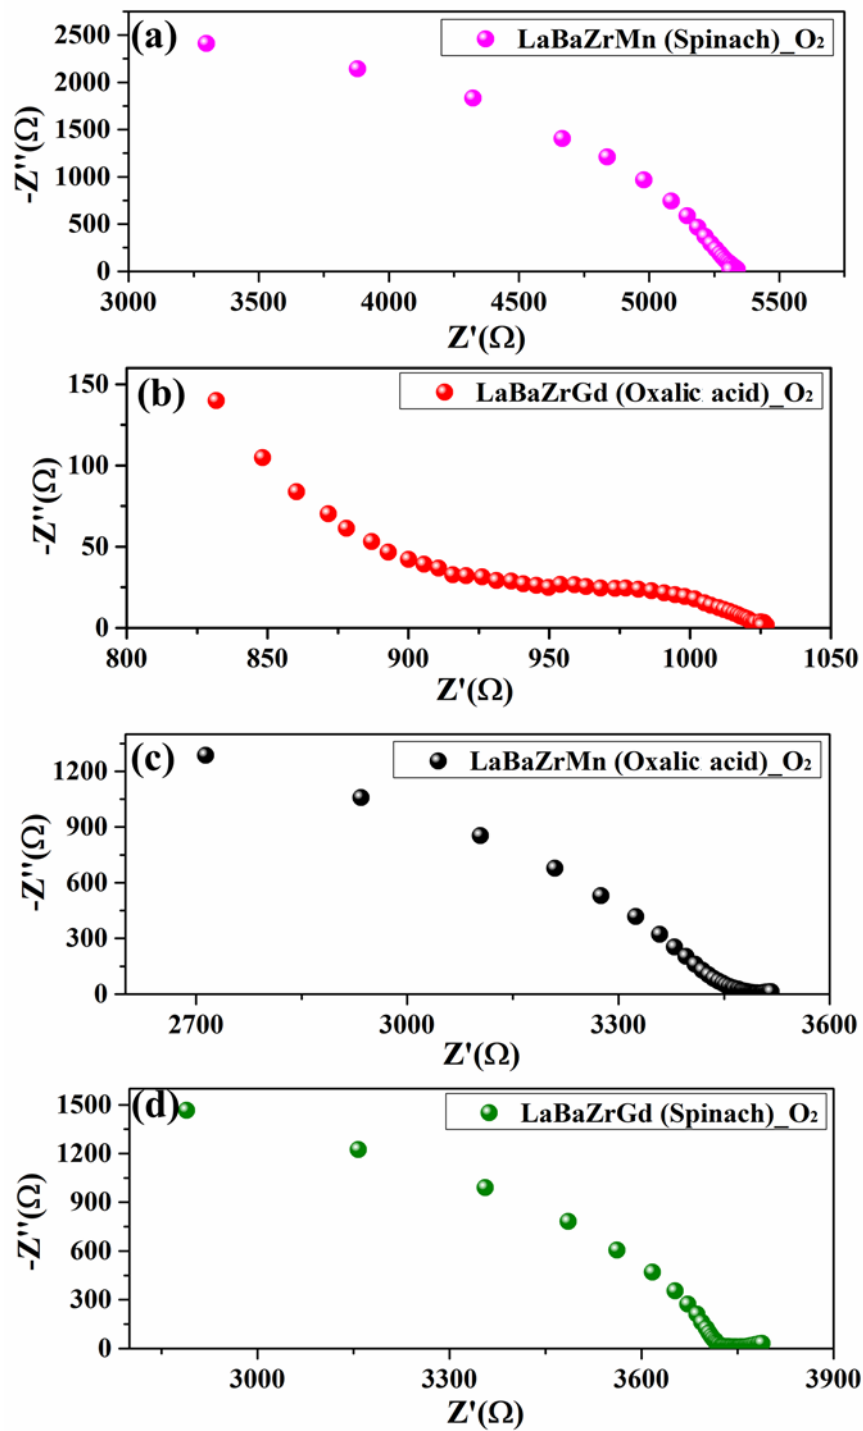

**Figure S1:** The electrochemical impedance spectra  $\text{La}_{0.3}\text{Ba}_{0.7}\text{Zr}_{0.5}\text{X}_{0.3}\text{Y}_{0.2}$  (X = Gd, Mn, and Ce) using oxalic acid and spinach as a chelating agent at 600 °C (a-d).
